# Supplementary material
Source: publisher site journal article supplement (https://www.kjim.org/upload/media/kjim-2023-300-Supplementary-Table-1.pdf)
Supplement: Supplementary file 1 [file kjim-2023-300-Supplementary-Table-1.pdf]

**Supplementary Table 1. Scoring system factors for predicting *H. pylori* infection**

| Endoscopic findings       | Presence   | Score |
|---------------------------|------------|-------|
| Diffuse or spotty redness | 0: Absent  | 0     |
|                           | 1: Present | 1     |
| Nodularity                | 0: Absent  | 0     |
|                           | 1: Present | 1     |
| RAC                       | 0: Absent  | 1     |
|                           | 1: Present | 0     |
| Total                     |            | 0–3   |

*H. pylori*, *Helicobacter pylori*; RAC, regular arrangement of collecting venules.
